# Supplementary material for: Transparency of chemical risk assessment data under REACH
Source: Royal Society of Chemistry journal article supplement (doi:10.1039/c6em00389c), 2016-01-01
Supplement: c6em00389c1.xlsx [file c6em00389c1.xlsx]

## Sheet: Table overview
Tables in the supplementary information:
Table SI1. Data and accessibility of references reported for the endpoint repeated dose toxicity for 60 substances.
Table SI2. Data per exposure route reported for the endpoint repeated dose toxicity for 60 substances.
Table SI3. Citations of references for data reported for the endpoint repeated dose toxicity.
Table SI4. Hazard assessment conclusions for 60 substances.
Table SI5. Information on DN(M)EL hazard assessment conclusions for 52 out of 60 substances.

## Sheet: Table 1
Table SI1. Data and accessibility of references reported for the endpoint repeated dose toxicity for 60 substances.
Type and number of endpoint study records (ESR) reported in the REACH registration database up until 2015-09-01 for the endpoint repeated dose toxicity for 60 substances. An endpoint study record is a template in the software program IUCLID with predefined fields and free text fields for summarizing data from a study for an endpoint. In the IUCLID field "study result type", the type of result is …
EC number	Study result type
	Experimental																Read-Across (RA)										Not specified (NS)				Planned	Waiving					Total no of ESR
	Key study			Supporting study			WoE			NS			DS			Total no of experimental ESR	Key study			Supporting study			WoE			Total no of read-across ESR	Data source inaccessible (industry data)	Data source inaccessible (public lit.)	Data source accessible (public lit.)	Total no of ESR not specified	Total no of planned studies ESR	Justification category				Total no of waiving ESR
	Data source inaccessible (industry data)	Data source inaccessible (public lit.)	Data source accessible (public lit.)	Data source inaccessible (industry data)	Data source inaccessible (public lit.)	Data source accessible (public lit.)	Data source inaccessible (industry data)	Data source inaccessible (public lit.)	Data source accessible (public lit.)	Data source inaccessible (industry data)	Data source inaccessible (public lit.)	Data source accessible (public lit.)	Data source inaccessible (industry data)	Data source inaccessible (public lit.)	Data source accessible (public lit.)		Data source inaccessible (industry data)	Data source inaccessible (public lit.)	Data source accessible (public lit.)	Data source inaccessible (industry data)	Data source inaccessible (public lit.)	Data source accessible (public lit.)	Data source inaccessible (industry data)	Data source inaccessible (public lit.)	Data source accessible (public lit.)							Study scientificially unjustified	Exposure considarations	Study technically not feasible	Other justification
201-126-0	1	0	9	0	0	2	0	0	0	0	0	0	0	0	0	12	0	0	0	0	0	0	0	0	0	0	0	0	0	0	0	0	0	0	1	1	13
201-133-9	2	0	0	0	0	0	0	0	0	0	0	1	0	0	0	3	0	0	0	1	0	0	0	0	0	1	0	0	0	0	0	0	0	0	0	0	4
201-167-4	0	0	2	0	0	3	0	0	0	0	0	0	0	0	0	5	0	0	0	0	0	0	0	0	0	0	0	0	0	0	0	0	0	0	1	1	6
201-245-8	1	3	0	2	0	0	0	0	0	0	0	0	0	0	0	6	0	0	0	0	0	0	0	0	0	0	0	0	0	0	0	0	0	0	1	1	7
201-250-5	1	0	0	2	0	0	0	0	0	0	0	0	0	0	0	3	0	0	0	0	0	0	0	0	0	0	0	0	0	0	0	0	0	0	2	2	5
201-553-2	1	0	0	0	0	0	0	0	0	0	0	0	0	0	0	1	1	0	0	0	0	0	0	0	0	1	0	0	0	0	0	0	0	0	0	0	2
201-557-4	2	1	0	0	2	0	0	0	0	0	0	0	0	0	0	5	0	0	0	0	0	0	0	0	0	0	0	0	0	0	0	1	0	0	0	1	6
201-622-7	6	0	0	1	0	0	0	0	0	0	0	0	0	0	0	7	0	0	0	0	0	0	0	0	0	0	3 (ns)	0	14 (ns)	17	0	0	0	0	0	0	24
202-969-7	1	0	0	2	0	0	0	0	0	1	0	8	0	0	0	12	0	0	0	0	0	0	0	0	0	0	0	0	0	0	0	0	0	0	0	0	12
203-452-9	1	0	0	0	0	0	0	0	0	0	0	0	0	0	0	1	0	0	0	3	1	0	0	0	0	4	0	0	0	0	0	0	0	1	0	1	6
203-539-1	1	0	5	6	0	10	0	0	2	0	0	0	0	0	0	24	0	0	0	0	0	0	0	0	0	0	0	0	0	0	0	0	0	0	0	0	24
203-710-0	1	0	0	0	0	0	0	0	0	0	0	0	0	0	0	1	0	0	0	0	0	0	0	0	0	0	1 (ns)	0	0	1	0	2	0	0	0	2	4
203-872-2	2	0	0	0	0	0	0	0	0	0	0	0	0	0	0	2	1	0	0	0	0	1	1	0	0	3	0	0	0	0	0	0	0	0	1	1	6
203-919-7	2	0	0	1	1	7	0	0	0	0	0	0	0	0	7	18	0	0	0	0	0	0	0	0	0	0	0	0	0	0	0	0	0	0	2	2	20
203-953-2	0	0	0	0	0	2	0	0	1	0	0	0	0	0	0	3	0	0	0	0	0	0	0	0	2	2	0	0	0	0	0	0	0	0	0	0	5
203-962-1	2	2	0	0	0	1	0	0	0	0	0	0	0	0	0	5	0	0	0	0	0	0	0	0	0	0	0	0	0	0	0	0	0	0	1	1	6
204-211-0	1	0	3	3	0	29	0	0	0	16	0	31	0	0	0	83	0	0	0	0	0	0	0	0	0	0	0	0	2 (1s;1ns)	2	0	0	0	0	0	0	85
204-709-8	1	0	0	8	0	1	0	0	0	0	0	0	0	0	0	10	0	0	0	0	0	0	0	0	0	0	0	0	0	0	0	0	0	0	0	0	10
212-454-9	0	0	1	1	0	0	2	0	0	0	0	0	0	0	0	4	0	0	0	4	0	0	0	0	0	4	0	0	0	0	0	0	0	0	1	1	9
213-561-3	3	0	0	2	0	0	0	0	0	0	0	0	0	0	0	5	0	0	0	0	0	0	0	0	0	0	0	0	0	0	0	0	0	0	2	2	7
214-604-9	0	0	2	0	0	1	0	0	0	0	0	0	0	0	1	4	0	0	0	0	0	0	0	0	0	0	0	0	0	0	0	0	0	0	0	0	4
220-666-8	1	0	0	0	1	0	0	0	0	0	0	0	0	0	0	2	0	0	0	0	0	0	0	0	0	0	0	0	0	0	0	0	1	0	0	1	3
222-182-2	6	0	0	2	0	0	0	0	0	1	1	0	1	0	0	11	0	0	0	0	0	0	0	0	0	0	1 (s)	0	0	1	0	0	1	0	0	1	13
223-861-6	2	0	0	0	0	0	0	0	0	0	0	0	0	0	0	2	0	0	0	0	0	0	0	0	0	0	2 (ns)	0	0	2	0	0	0	0	2	2	6
225-863-2	1	0	0	2	0	0	0	0	0	2	0	0	0	0	0	5	0	0	0	0	0	0	0	0	0	0	0	0	0	0	0	0	0	0	2	2	7
225-878-4	4	0	0	2	0	1	0	0	0	0	0	0	0	0	0	7	0	0	0	0	0	0	0	0	0	0	0	0	0	0	0	0	0	0	0	0	7
226-775-7	2	0	0	2	0	0	0	0	0	0	0	0	0	0	0	4	0	0	0	0	0	0	0	0	0	0	0	0	0	0	0	0	0	0	0	0	4
229-962-1	2	0	0	0	0	0	0	0	0	0	0	0	0	0	0	2	0	0	0	1	0	0	0	0	0	1	0	0	0	0	0	0	0	0	1	1	4
231-152-8	2	2	3	0	4	3	0	0	0	0	0	0	0	0	0	14	0	0	0	0	0	0	0	0	0	0	0	1 (s)	0	1	0	0	1	0	0	1	16
232-752-2	1	0	0	1	0	0	0	0	0	0	0	0	0	0	0	2	0	0	0	0	0	0	0	0	0	0	0	0	0	0	0	1	1	0	0	2	4
234-186-1	0	0	0	0	0	0	0	0	0	0	0	0	0	0	0	0	1	0	1	0	0	2	0	0	0	4	0	0	0	0	0	2	0	0	0	2	6
242-393-3	1	0	0	0	0	0	0	0	0	0	0	0	0	0	0	1	0	0	0	0	0	0	0	0	0	0	0	0	0	0	0	1	0	0	0	1	2
245-883-5	0	0	0	0	0	0	0	0	0	0	0	0	0	0	0	0	0	2	0	0	0	0	0	0	0	2	0	0	0	0	0	0	0	0	1	1	3
247-148-4	1	0	0	1	0	1	0	0	0	0	0	0	0	0	0	3	0	0	0	0	0	0	0	0	0	0	0	0	0	0	0	0	0	0	0	0	3
248-131-4	6	0	0	6	0	0	0	0	0	0	0	0	0	0	0	12	0	0	0	0	0	0	0	0	0	0	0	0	0	0	1	0	0	0	3	3	16
249-828-6	1	0	0	1	0	0	0	0	0	0	0	0	0	0	0	2	0	0	0	0	0	0	0	0	0	0	0	0	0	0	0	0	0	0	0	0	2
249-951-5	4	0	0	2	0	0	0	0	0	0	0	0	0	0	0	6	0	0	0	0	0	0	0	0	0	0	0	0	0	0	0	0	0	0	0	0	6
252-104-2	1	0	3	2	0	5	0	0	0	0	0	0	0	0	0	11	0	0	0	0	0	0	0	0	0	0	0	0	0	0	0	0	0	0	0	0	11
256-181-3	2	0	0	0	0	0	0	0	0	0	0	0	0	0	0	2	0	0	0	0	0	0	0	0	0	0	0	0	0	0	0	0	1	0	1	2	4
260-350-7	1	0	0	0	0	0	0	0	0	0	0	0	0	0	0	1	0	0	0	3	0	0	0	0	0	3	0	0	0	0	0	1	0	0	0	1	5
261-385-0	0	0	0	0	0	0	0	0	0	0	0	0	0	0	0	0	1	0	0	0	0	0	0	0	0	1	0	0	0	0	0	0	0	0	2	2	3
270-299-2	0	1	0	0	0	1	0	0	0	0	0	0	0	0	0	2	0	0	0	0	0	0	0	0	0	0	0	0	0	0	0	2	0	0	0	2	4
271-094-0	0	0	0	0	0	0	0	0	0	0	0	0	0	0	0	0	2	0	0	1	1	0	0	0	0	4	0	0	0	0	0	2	0	0	0	2	6
272-221-2	2	0	0	0	0	0	0	0	0	0	0	0	0	0	0	2	0	0	0	0	0	0	0	0	0	0	0	0	0	0	0	2	0	0	0	2	4
272-727-3	0	0	0	0	0	0	0	0	0	0	0	0	0	0	0	0	0	0	0	1	0	0	0	0	0	1	0	0	0	0	0	0	3	0	0	3	4
275-809-7	2	0	0	0	0	0	0	0	0	0	0	0	0	0	0	2	0	0	0	1	1	0	0	0	0	2	0	0	0	0	0	2	0	0	0	2	6
284-325-5	1	1	1	1	0	0	0	0	0	0	0	0	0	1	0	5	0	0	0	0	0	0	0	0	0	0	0	0	0	0	0	0	0	0	0	0	5
310-079-6	1	0	0	0	0	0	0	0	0	0	0	0	0	0	0	1	0	0	0	0	0	0	0	0	0	0	0	0	0	0	0	0	0	0	0	0	1
438-390-3	0	0	0	0	0	0	0	0	0	0	0	0	0	0	0	0	2	0	0	4	0	0	0	0	0	6	1 (ns)	0	0	1	0	0	0	0	3	3	10
500-033-5	3	0	0	6	2	0	0	0	0	0	0	0	0	0	0	11	0	0	0	0	0	0	0	0	0	0	0	0	0	0	0	0	0	0	0	0	11
603-923-2	4	0	0	5	0	0	0	0	0	0	0	0	0	0	0	9	0	0	0	0	0	0	0	0	0	0	0	0	0	0	0	0	0	0	1	1	10
603-931-6	1	0	0	0	0	0	0	0	0	0	0	0	0	0	0	1	0	1	0	0	1	1	0	0	0	3	0	0	0	0	0	0	0	0	0	0	4
620-174-7	2	0	0	0	0	0	0	0	0	0	0	0	0	0	0	2	0	0	0	0	0	0	0	0	0	0	0	0	0	0	0	0	0	0	2	2	4
641-136-6	2	0	0	0	0	0	0	0	0	0	0	0	0	0	0	2	0	0	0	0	0	0	0	0	0	0	0	0	0	0	0	0	0	0	0	0	2
700-976-4	0	0	0	0	0	0	0	0	0	0	0	0	0	0	0	0	3	0	0	1	0	0	0	0	0	4	0	0	0	0	0	0	0	0	0	0	4
905-588-0	2	0	0	2	0	3	0	0	0	0	0	0	0	0	0	7	0	0	0	0	0	0	0	0	0	0	0	0	0	0	0	0	0	0	0	0	7
908-918-1	0	1	0	0	0	0	0	0	0	0	0	0	0	0	0	1	0	0	0	0	0	0	0	0	0	0	0	0	0	0	0	0	0	0	0	0	1
932-019-3	1	0	0	0	0	0	0	0	0	0	0	0	0	0	0	1	0	0	0	2	0	0	0	0	0	2	0	0	0	0	0	2	0	0	0	2	5
934-268-3	6	0	0	6	0	0	0	0	0	0	0	0	0	0	0	12	0	0	0	0	0	0	0	0	0	0	0	0	0	0	1	0	0	0	3	3	16
939-340-8	0	0	2	0	0	0	0	0	0	1	0	0	0	0	0	3	0	0	0	0	0	0	0	0	0	0	0	0	0	0	0	0	0	0	2	2	5
Total ESR	94	11	31	69	10	70	2	0	3	21	1	40	1	1	8	362	11	3	1	22	4	4	1	0	2	48	8	1	16	25	2	18	8	1	35	62	499
Total ESR (excl. DEHP)	93	11	28	66	10	41	2	0	3	5	1	9	1	1	8	279	11	3	1	22	4	4	1	0	2	48	8	1	14	23	2	18	8	1	35	62

## Sheet: Table 2
Table SI2. Data per exposure route reported for the endpoint repeated dose toxicity for 60 substances.
Type and number of endpoint study records (ESR) reported for each exposure route in the REACH registration database up until 2015-09-01 for the endpoint repeated dose toxicity for 60 substances. An endpoint study record is a template in the software program IUCLID with predefined fields and free text fields for summarizing data from a study for an endpoint. In the IUCLID field "study result type"…
EC number	Exposure route
	Inhalation				Oral					Dermal				Other
	Experimental	Read-across	Waiving	Not specified	Experimental	Read-across	Waiving	Not specified	Planned	Experimental	Read-across	Waiving	Not specified	Experimental	Read-across	Waiving	Not specified
201-126-0	6	0	0	0	5	0	0	0	0	0	0	1	0	1a	0	0	0
201-133-9	0	0	0	0	1	1	0	0	0	2	0	0	0	0	0	0	0
201-167-4	3	0	0	0	2	0	0	0	0	0	0	1	0	0	0	0	0
201-245-8	1	0	0	0	5	0	0	0	0	0	0	1	0	0	0	0	0
201-250-5	0	0	1	0	3	0	0	0	0	0	0	1	0	0	0	0	0
201-553-2	0	0	0	0	1	1	0	0	0	0	0	0	0	0	0	0	0
201-557-4	1	0	0	0	3	0	0	0	0	1	0	1	0	0	0	0	0
201-622-7	2	0	0	3	5	0	0	14	0	0	0	0	0	0	0	0	0
202-969-7	3	0	0	0	9	0	0	0	0	0	0	0	0	0	0	0	0
203-452-9	1	3	0	0	0	1	0	0	0	0	0	1	0	0	0	0	0
203-539-1	18	0	0	0	3	0	0	0	0	3	0	0	0	0	0	0	0
203-710-0	0	0	1	0	1	0	0	1	0	0	0	1	0	0	0	0	0
203-872-2	0	0	1	0	2	0	0	0	0	0	3	0	0	0	0	0	0
203-919-7	2	0	1	0	13	0	0	0	0	3	0	1	0	0	0	0	0
203-953-2	3	2	0	0	1	0	0	0	0	0	0	0	0	1b	0	0	0
203-962-1	0	0	1	0	2	0	0	0	0	3	0	0	0	0	0	0	0
204-211-0	4	0	0	0	72	0	0	2	0	1	0	0	0	6c	0	0	0
204-709-8	1	0	0	0	9	0	0	0	0	0	0	0	0	0	0	0	0
212-454-9	2	4	0	0	2	0	0	0	0	0	0	1	0	0	0	0	0
213-561-3	0	0	1	0	5	0	0	0	0	0	0	1	0	0	0	0	0
214-604-9	0	0	0	0	4	0	0	0	0	0	0	0	0	0	0	0	0
220-666-8	1	0	0	0	1	0	0	0	0	0	0	1	0	0	0	0	0
222-182-2	1	0	1	0	9	0	0	1	0	1	0	0	0	0	0	0	0
223-861-6	2	0	0	2	0	0	1	0	0	0	0	1	0	0	0	0	0
225-863-2	5	0	0	0	0	0	1	0	0	0	0	1	0	0	0	0	0
225-878-4	3	0	0	0	2	0	0	0	0	2	0	0	0	0	0	0	0
226-775-7	0	0	0	0	2	0	0	0	0	2	0	0	0	0	0	0	0
229-962-1	1	0	0	0	1	1	0	0	0	0	0	1	0	0	0	0	0
231-152-8	8	0	0	1	6	0	0	0	0	0	0	1	0	0	0	0	0
232-752-2	0	0	1	0	1	0	0	0	0	1	0	1	0	0	0	0	0
234-186-1	0	0	1	0	0	4	0	0	0	0	0	1	0	0	0	0	0
242-393-3	0	0	0	0	1	0	1	0	0	0	0	0	0	0	0	0	0
245-883-5	0	0	1	0	0	1	0	0	0	0	1	0	0	0	0	0	0
247-148-4	0	0	0	0	3	0	0	0	0	0	0	0	0	0	0	0	0
248-131-4	3	0	1	0	7	0	1	0	1	2	0	1	0	0	0	0	0
249-828-6	0	0	0	0	2	0	0	0	0	0	0	0	0	0	0	0	0
249-951-5	2	0	0	0	3	0	0	0	0	1	0	0	0	0	0	0	0
252-104-2	8	0	0	0	1	0	0	0	0	2	0	0	0	0	0	0	0
256-181-3	0	0	1	0	2	0	0	0	0	0	0	1	0	0	0	0	0
260-350-7	0	0	0	0	1	3	0	0	0	0	0	1	0	0	0	0	0
261-385-0	0	0	1	0	0	1	0	0	0	0	0	1	0	0	0	0	0
270-299-2	0	0	1	0	2	0	0	0	0	0	0	1	0	0	0	0	0
271-094-0	0	0	1	0	0	4	0	0	0	0	0	1	0	0	0	0	0
272-221-2	0	0	1	0	2	0	0	0	0	0	0	1	0	0	0	0	0
272-727-3	0	0	1	0	0	1	1	0	0	0	0	1	0	0	0	0	0
275-809-7	0	0	1	0	2	2	0	0	0	0	0	1	0	0	0	0	0
284-325-5	0	0	0	0	5	0	0	0	0	0	0	0	0	0	0	0	0
310-079-6	0	0	0	0	1	0	0	0	0	0	0	0	0	0	0	0	0
438-390-3	0	0	1	0	0	6	1	1	0	0	0	1	0	0	0	0	0
500-033-5	0	0	0	0	5	0	0	0	0	6	0	0	0	0	0	0	0
603-923-2	0	0	1	0	8	0	0	0	0	1	0	0	0	0	0	0	0
603-931-6	0	1	0	0	1	2	0	0	0	0	0	0	0	0	0	0	0
620-174-7	0	0	1	0	2	0	0	0	0	0	0	1	0	0	0	0	0
641-136-6	0	0	0	0	2	0	0	0	0	0	0	0	0	0	0	0	0
700-976-4	0	1	0	0	0	2	0	0	0	0	1	0	0	0	0	0	0
905-588-0	2	0	0	0	5	0	0	0	0	0	0	0	0	0	0	0	0
908-918-1	1	0	0	0	0	0	0	0	0	0	0	0	0	0	0	0	0
932-019-3	0	0	1	0	1	2	0	0	0	0	0	1	0	0	0	0	0
934-268-3	3	0	1	0	7	0	1	0	1	2	0	1	0	0	0	0	0
939-340-8	3	0	0	0	0	0	1	0	0	0	0	1	0	0	0	0	0
a route of exposure specified as oral gelatine capsules
b route of exposure specified as inhalative and orally
c route of exposure: intravenous and intraperitoneal

## Sheet: Table 3
Table SI3. Citations of data source for reported data for the endpoint repeated dose toxicity.
Cited data source for repeated dose toxicity data reported up until 2015-09-01 for 60 substances in the REACH registration database. The data source citations are divided into complete and incomplete data source citations (in general only information on reference type and year) and further divided into how the data were used in the assessment (K= key, S= supporting, WoE= weight of evidence, DS= d…
Reference type	Number of citations
	Substances (excluding DEHP)											DEHP							Total citations (incl DEHP)
	Complete data source citations					Incomplete data source citations					Total	Complete data source citations			Incomplete data source citations			Total
	K	S	WoE	DS	NS	K	S	WoE	DS	NS		K	S	NS	K	S	NS
Study report	0	0	0	0	0	131	105	6	3	6	251	0	0	0	3	8	10	21	272
Publication	31	43	5	11	9	15	14	0	0	0	128	3	34	33	2	0	0	72	200
Other company data	0	0	0	0	0	0	1	0	1	0	2	0	0	0	0	1	9	10	12
Secondary source	0	5	0	3	0	0	0	2	0	0	10	0	0	0	0	0	0	0	10
EU risk assessment report	0	3	0	0	0	0	0	0	0	0	3	0	0	0	0	0	0	0	3
Review article or handbook	0	0	0	0	0	0	0	0	0	1	1	0	0	0	0	0	0	0	1
Other: Body responsible for the test	0	0	0	0	0	0	0	0	0	1	1	0	0	0	0	0	0	0	1
Other: HPV summary	0	0	0	0	0	1	0	0	0	0	1	0	0	0	0	0	0	0	1
Other: Secondary quotation	0	0	0	0	0	0	0	0	0	1	1	0	0	0	0	0	0	0	1
Blanka	0	0	0	0	17b	0	4c	0	0	1d	22	0	0	0	0	0	0	0	22
Total											420							103	523
aThe field "reference type" was not reported but information was given elsewhere in the record.
b12 publications, 2 NTP reports, 1 Bibra report (consultance report) and 2 company data. For the Bibra report and the 2 company data, the report number was given.
c3 unpublished reports, 1 peer review
d1 company data

## Sheet: Table 4
Table SI4. Reported hazard assessment conclusions for 60 substances.
Information disseminated on hazard assessment conclusions in the IUCLID section "endpoint summary: toxicological information" in the REACH registration database up until 2015-09-01 for 60 substances for various exposure patterns (exposure route/exposure group/type of effect/exposure duration). Fields reported in IUCLID for toxicological information include Hazard Assessment Conclusion (HAC), Most…
EC number	IUCLID section	Endpoint summary: Toxicological information
	Exposure route	Inhalation																								Dermal
	Exposure group	Workers												General population												Workers												General population
	Type of effect	Systemic						Local						Systemic						Local						Systemic						Local						Systemic						Local
	Exposure duration	Long term			Short term			Long term			Short term			Long term			Short term			Long term			Short term			Long term			Short term			Long term			Short term			Long term			Short term			Long term			Short term
	Fields in IUCLID	HAC	MSE	ER	HAC	MSE	ER	HAC	MSE	ER	HAC	MSE	ER	HAC	MSE	ER	HAC	MSE	ER	HAC	MSE	ER	HAC	MSE	ER	HAC	MSE	ER	HAC	MSE	ER	HAC	MSE	ER	HAC	MSE	ER	HAC	MSE	ER	HAC	MSE	ER	HAC	MSE	ER	HAC	MSE	ER
201-126-0		2	I	-	2	I	-	2	III	-	2	III	-													2	I	-	2	I	-
201-133-9		2	I	-										2	I	-										2	I	-				2	V	-				2	I	-				2	V	-	2	V	-
201-167-4		2	I	In	2	I	In																			2	I	In	8	-	-				8	-	-
201-245-8		2	I		2	I		2	III		2	III		2	I		2	I		2	III		2	III		2	I		2	I								2	I		2	I
201-250-5		2	I	Or										2	I	Or										2	I	Or										2	I	Or
201-553-2	Tox 1	2	II	Or	8	-	-	8	-	-	8	-	-	2	II	Or	8	-	-	8	-	-	8	-	-	2	II	Or	8	-	-	8	-	-	8	-	-	8	-	-	8	-	-	8	-	-	8	-	-
	Tox 2 (JS Member)	2	I	-	6	-	-	6	-	-	6	-	-													2	I	-	6	-	-	6	-	-	6	-	-
201-557-4	Tox 1	2	II	Or	2*	I	In	8	-	-	8	-	-	2	II	Or	8	-	-	8	-	-	8	-	-	2	II	Or	8	-	-	8	-	-	8	-	-	2	II	Or	8	-	-	8	-	-	8	-	-
	Tox 2	2	II	-	2	I		6	-	-	6	-	-	2	II	-	6	-	-	6	-	-	6	-	-	2	II	-	6	-	-	6	-	-	6	-	-	2	II	-	6	-	-	6	-	-	6	-	-
201-622-7		2	I	-										2	I	-										2	I	-										2	I	-
202-969-7		2	-	-	2	-	-							2	I	-	2	-	-							2	-	-	2	-	-	0	V	-	0	V	-	2	I	-	2	-	-	0	V	-	0	V	-
203-452-9		2	I	-				2	I	-				2	I	-				2	I	-
203-539-1		2	I	In	2	VIIII	-	8	-	-	2	VIIII	-	2	I	In	8	-	-	8	-	-	8	-	-	2	I	De	8	-	-	8	-	-	8	-	-	2	I	De	8	-	-	8	-	-	8	-	-
203-710-0		2	-	-	2	-	-	2	-	-	2	-	-													2	I	-	2	I	-	6	-	-	2	V	-
203-872-2		2	III	In	8	VII	-	2	III	-	8	-	-	2	III	In	8	VII	-	2	III	-	8	IV	-	2	I	De	8	VII	De	8	IV	-	8	IV	-	2	I	De	8	VII	De	8	IV	-	8	IV	-
203-919-7		2	I	In	8	-	-	2	I	-	8	-	-	2	I	In	8	-	-	2	I	-	8	-	-	2	I	De	8	-	-	8	-	-	8	-	-	2	I	De	8	-	-	8	-	-	8	-	-
203-953-2											2	III	-										2	III	-	2	I	-										2	I	-
203-962-1		2	I	Or	8	-	-	8	-	-	8	-	-	2	I	Or	8	-	-	8	-	-	8	-	-	2	I	De	8	-	-	8	-	-	8	-	-	2	I	De	8	-	-	8	-	-	8	-	-
204-211-0		2	II	Or	8	-	-	8	-	-	8	-	-	2	II	Or	8	-	-	8	-	-	8	-	-	2	II	Or	8	-	-	8	-	-	8	-	-	2	II	Or	8	-	-	8	-	-	8	-	-
204-709-8		2	I	-										2	I	-										2	I	-										2	I	-
212-454-9								2	III	-										2	III	-
213-561-3		2	I	-				2	-	-																2	I	-										2	I	-
214-604-9		2	I	-	3	-	-	3	-	-	3	-	-	2	I	-	3	-	-	3	-	-	3	-	-	3	-	-	3	-	-	3	-	-	3	-	-	3	-	-	3	-	-	3	-	-	3	-	-
220-666-8		8	III	-	8	III	-	2	III	-	2*	III	-	8	-	-	8	-	-	4	-	-	4	-	-	8	-	-	8	-	-	9	V	-	9	IV	-	8	-	-	8	-	-	4	-	-	4	-	-
222-182-2		2	I	Or	8	-	-	8	-	-	8	-	-													2	I	-	8	-	-	5	-	-	5	-	-
223-861-6								2	III	-	2	III	-													0	VI	-	0	VI	-	0	VI	-	0	VI	-
225-863-2								2	III	-	2	III	-																			0	VI	-	0	VI	-
225-878-4		2	I	-										2	I	-										2	I	-				2	IV	-	2	IV	-	2	I	-				2	IV	-	2	IV	-
226-775-7																										2	I	-										2	I	-
229-962-1		2	I	In				2	I	-																2	I	Or				9	-	-	9	-
231-152-8								2	I	-																									8	III	-							5	-	-	8	IV	-
232-752-2		1	VI	-	8	VI	-	1	VI	-	8	VI	-	1	VI	-	8	-	-	1	VI	-	8	-	-	8	-	-	8	-	-	11	IV	-	11	IV	-	8	-	-	8	-	-	11	IV	-	11	IV	-
234-186-1		2	I	-	2	II	-	6	-	-	6	-	-	2	I	-	2	II	-	6	-	-	6	-	-	2	I	-	2	II	-	6	-	-	6	-	-	2	I	-	2	II	-	6	-	-	6	-	-
242-393-3		2	I	-	2	VII	-	6	-	-	6	-	-	2	I	-	2	VII	-	6	-	-	6	-	-	2	I	-	2	VII	-	6	IV	-	6	IV	-	2	I	-	2	VII	-	6	-	-	6	VII	-
245-883-5		2	-	-	6	-	-	6	-	-	6	-	-	2	-	-	6	-	-	6	-	-	6	-	-	2	I	-	6	-	-	6	-	-	6	-	-	2	I	-	6	-	-	6	-	-	6	-	-
247-148-4		2	II	-	6	-	-	6	-	-	1	-	-	2	II	-	6	-	-	6	-	-	6	-	-	2	II	-	6	-	-	6	-	-	6	-	-	2	II	-	6	-	-	6	-	-	6	-	-
248-131-4		8	-	-	8	-	-	8	-	-	8	-	-	8	-	-	8	-	-	8	-	-	8	-	-	8	-	-	8	-	-	8	-	-	8	-	-	8	-	-	8	-	-	8	-	-	8	-	-
249-828-6		2	I	-	6	-	-	6	-	-	6	-	-	2	I	-	6	-	-	6	-	-	6	-	-	2	I	-	6	-	-	6	-	-	6	-	-	2	I	-	6	-	-	6	-	-	6	-	-
249-951-5		2	I	-										2	I	-										2	I	-										2	I	-
252-104-2		2	I	In	8	-	-	8	-	-	8	-	-	2	I	In	8	-	-	8	-	-	8	-	-	2	I	De	8	-	-	8	-	-	8	-	-	2	I	De	8	-	-	8	-	-	8	-	-
256-181-3		3	-	-	3	-	-	3	-	-	3	-	-	3	-	-	3	-	-	3	-	-	3	-	-	2	I	-	2	VII	-							3	-	-	3	-	-	3	-	-	3	-	-
260-350-7		2	I	Or	2*	I	Or	8	-	-	8	-	-	2	I	Or	2*	I	Or	8	-	-	8	-	-	2	I	Or	2*	I	Or	8	-	-	8	-	-	8	-	-	8	-	-	8	-	-	8	-	-
261-385-0		2	I	Or	8	-	-	4	-	-	4	-	-	2	I	Or	8	-	-	4	-	-	4	-	-	2	I	Or	8	-	-	8	-	-	8	-	-	2	I	Or	8	-	-	8	-	-	8	-	-
270-299-2
271-094-0	Tox 1	2	I	Or	8	-	-	8	-	-	8	-	-	2	I	Or	8	-	-	8	-	-	8	-	-	2	I	Or	8	-	-	8	-	-	8	-	-	2	I	Or	8	-	-	8	-	-	8	-	-
	Tox 2	2	I	-										2	I	-										2	I	-										2	I	-
272-221-2		2	I	Or	8	-	-	8	-	-	8	-	-	2	I	Or	8	-	-	8	-	-	8	-	-	2	I	Or	7	-	-	9	V	-	7	V	-	2	I	Or	7	-	-	10	V	-	7	-	-
272-727-3		4	-	-	4	-	-	9	-	-	9	-	-													4	-	-	4	-	-	9	-	-	9	-	-
275-809-7		2	I	-										2	I	-										2	I	-										2	I	-
284-325-5		2	I	-	2	I	-	6	-	-	6	-	-	2	I	-	2	-	-	6	-	-	6	-	-	2	I	-	2	I	-	6	-	-	6	-	-	2	I	-	2	-	-	6	-	-	6	-	-
310-079-6
438-390-3
500-033-5		2	I	-	2	I	-	4	-	-	4	-	-	2	I	-	2	I	-	4	-	-	4	-	-	2	I	-	2	I	-	8	-	-	10	V	-	2	I	-	2	I	-	8	-	-	10	V	-
603-923-2		2	I	-										2	I	-										2	I	-										2	I	-
603-931-6		2	-	-										2	-	-										2	-	-										2	-	-
620-174-7		8	-	-	8	-	-	8	-	-	8	-	-	8	-	-	8	-	-	8	-	-	8	-	-	2	IX	Or	8	-	-	8	-	-	8	-	-	2	I	Or	8	-	-	8	-	-	8	-	-
641-136-6		8	-	-	8	-	-	8	-	-	8	-	-	8	-	-	8	-	-	8	-	-	8	-	-	8	-	-	8	-	-	8	-	-	8	-	-	8	-	-	8	-	-
700-976-4		6	-	-	6	-	-	6	-	-	6	-	-	6	-	-	6	-	-	6	-	-	6	-	-	6	-	-	6	-	-	6	-	-	6	-	-	6	-	-	6	-	-	6	-	-	6	-	-
905-588-0		2	I	-	2	-	-	6	-	-	2	III	-	2	I	-	6	-	-	6	-	-	6	III	-	2	I	-	6	-	-	6	-	-	6	-	-	2	I	-	6	-	-	6	-	-	6	-	-
908-918-1								2	-	-				2	I	-				2	-	-				2	I	-										2	I	-
932-019-3		2	-	-										2	-	-										2	-	-										2	-	-
934-268-3		8	-	-	8	-	-	8	-	-	8	-	-	8	-	-	8	-	-	8	-	-	8	-	-	8	-	-	8	-	-	8	-	-	8	-	-	8	-	-	8	-	-	8	-	-	8	-	-
939-340-8		8	-	-	8	-	-	2	III	-	2	III	-													8	-	-	8	-	-	10	V	-	10	V	-
[truncated: 12 more columns]

## Sheet: Table 5
Table SI5. Information on DN(M)EL hazard assessment conclusions for 52 out of 60 substances.
Information reported in the REACH registration database up until 2015-09-01 in the section "endpoint summary: toxicological information" for DN(M)EL hazard assessment conclusions for 52 out of 60 substances. For eight substances, no DNEL or DMEL hazard assessment conclusions were provided.
EC number	Toxicological information
	Hazard assessment conclusion DN(M)EL								Most sensitive endpoint	Route of original study
	Total number of DN(M)EL Hazard Assessment Conclusions	DN(M)EL value	Overall assessment factor	Specific assessment factor and justification	Dose descriptor starting point (e.g. NOAEL, LOAEL) (after route to route extrapolation)	Dose descriptor starting point (value)	Justification for route to route extrapolation	DNEL derivation method
201-126-0	7	7	2	0	2	0	0	0	7	0
201-133-9	9	9	9	0	4	0	0	0	9	0
201-167-4	3	3	0	0	0	0	1	3	3	3
201-245-8	14	14	4	0	14	0	0	0	14	0
201-250-5	5	5	5	0	5	5	0	0	5	5
201-553-2	6a	6	6	4	4	4	4	4	6	4
201-557-4	12b	12	6	5	9	5	4	6	12	6
201-622-7	5	5	5	0	5	0	0	0	5	0
202-969-7	10	10c	0	0	0	0	0	0	3	0
203-452-9	4	4	4	0	3	0	0	0	4	0
203-539-1	7	7	3	3	3	3	3	7	7	5
203-710-0	7	7	2	0	3	0	0	0	3	0
203-872-2	6	6	4	4	4	2	1	4	6	6
203-919-7	7	7	7	7	7	5	0	6	7	5
203-953-2	4	4	4	0	4	0	0	0	4	0
203-962-1	5	5	5	5	5	5	2	4	5	0
204-211-0	5	5	5	5	5	5	5	5	5	5
204-709-8	5	5	5	0	4	0	0	0	5	0
212-454-9	2	2	2	0	2	0	0	0	2	0
213-561-3	5	5	4	0	4	0	0	0	4	0
214-604-9	4	4	4	0	1	0	0	0	4	0
220-666-8	3	3	2	2	2	2	2	3	3	1
222-182-2	2	2	2	0	2	0	0	1	2	1
223-861-6	2	2	2	0	2	0	0	0	2	0
225-863-2	2	2	0	0	0	0	0	0	2	0
225-878-4	9	9	5	0	8	0	0	0	9	0
226-775-7	3	3	3	0	3	0	0	0	3	0
229-962-1	3	3	3	3	3	2	2	3	3	2
231-152-8	2	2	2	1	2	0	0	1	2	0
232-752-2	6d	6	2	2	2	2	2	6	6	2
234-186-1	10	10	10	0	6	0	0	0	10	0
242-393-3	10	10	10	0	0	0	0	0	10	0
245-883-5	5	5	3	3	0	0	0	0	3	0
247-148-4	6e	5	5	0	5	0	0	0	5	0
248-131-4	0	0	0	0	0	0	0	0	0	0
249-828-6	5	5	5	0	5	0	0	0	5	0
249-951-5	5	5	5	0	5	0	0	0	5	5
252-104-2	5	5	3	3	3	3	3	5	5	5
256-181-3	2	2	2	0	2	0	0	0	2	0
260-350-7	8	8	8	4	6	4	4	8	8	8
261-385-0	5	5	5	4	5	5	0	0	5	5
270-299-2	0	0	0	0	0	0	0	0	0	0
271-094-0	10b	10	10	5	10	4	5	5	10	5
272-221-2	5	5	5	5	5	5	4	5	5	5
272-727-3	0	0	0	0	0	0	0	0	0	0
275-809-7	5	5	5	0	5	0	0	0	5	0
284-325-5	10	10	5	0	7	0	0	0	7	0
310-079-6	0	0	0	0	0	0	0	0	0	0
438-390-3	0	0	0	0	0	0	0	0	0	0
500-033-5	10	8	10	0	10	0	0	0	10	0
603-923-2	4	4	4	0	4	0	0	0	4	0
603-931-6	5	5	5	0	0	0	0	0	0	0
620-174-7	3	3	3	3	3	3	3	3	3	3
641-136-6	0	0	0	0	0	0	0	0	0	0
700-976-4	0	0	0	0	0	0	0	0	0	0
905-588-0	7	7	6	0	6	0	0	0	6	0
908-918-1	6	6	5	4	0	0	0	0	4	0
932-019-3	5	5	0	0	0	0	0	0	0	0
934-268-3	0	0	0	0	0	0	0	0	0	0
939-340-8	2	2	0	0	0	0	0	0	2	0
Total	297	294 (99 %)	221 (74 %)	72 (24 %)	199 (67 %)	64 (22 %)	45 (15 %)	79 (27 %)	266 (90 %)	81 (27 %)
a = Two toxicological summaries provided of which one is an opt-out from the joint submission group labelled "JS Member"
b= Two toxicological summaries provided
c = One DNEL value had no unit.
d = 4 DMEL values
e = 1 DMEL value
